# Supplementary material
Source: publisher figshare collection journal article supplement (https://karger.figshare.com/ndownloader/files/14687353)
Supplement: Supplementary file 1 [file 14687353]

*Note.* EF = Executive Function; W1 = Wave 2; W2 = Wave 2; W3 = Wave 3; AIC = Akaike information criterion; BIC = Bayesian information criterion; RMSEA = Root Mean Square Error of Approximation; CFI = Comparative Fit Index; SRMR = Standardized Root Mean Square Residual

* = preferred model
